# Supplementary material for: Genetic Contribution to Alcohol Dependence: Investigation of a Heterogeneous German Sample of Individuals with Alcohol Dependence, Chronic Alcoholic Pancreatitis, and Alcohol-Related Cirrhosis
Source: PubMed Central journal article supplement (PMC5541316; doi:10.3390/genes8070183), 2017-07-17
Supplement: genes-08-00183-s001.pdf [file genes-08-00183-s001.pdf]

# Supplementary Materials: Genetic Contribution to Alcohol Dependence: Investigation of a Heterogeneous German Sample of Individuals with Alcohol Dependence, Chronic Alcoholic Pancreatitis, and Alcohol-related Cirrhosis

Jens Treutlein, Josef Frank, Fabian Streit, Céline S. Reinbold, Dilafruz Juraeva, Franziska Degenhardt, Liz Rietschel, Stephanie H. Witt, Andreas J. Forstner, Monika Ridinger, Jana Strohmaier, Norbert Wodarz, Helene Dukal, Jerome C. Foo, Per Hoffmann, Stefan Herms, Stefanie Heilmann-Heimbach, Michael Soyka, Wolfgang Maier, Wolfgang Gaebel, Norbert Dahmen, Norbert Scherbaum, Bertram Müller-Myhsok, Susanne Lucae, Marcus Ising, Felix Stickel, Thomas Berg, Susanne Möbus, Karl-Heinz Jöckel, Henrike Scholz, Ulrich S. Zimmermann, Stephan Buch, Wolfgang H. Sommer, Rainer Spanagel, Benedikt Brors, Sven Cichon, Karl Mann, Falk Kiefer, Jochen Hampe, Jonas Rosendahl, Markus M. Nöthen, and Marcella Rietschel

**Figure S1.** Regional association plot of the alcohol dehydrogenase gene region in the combined sample. The strongest variant in this region, rs1789891, is located within +20kb of *ADH1B* and *ADH1C*, and therefore contributes to the gene-based *P*-values of both genes.

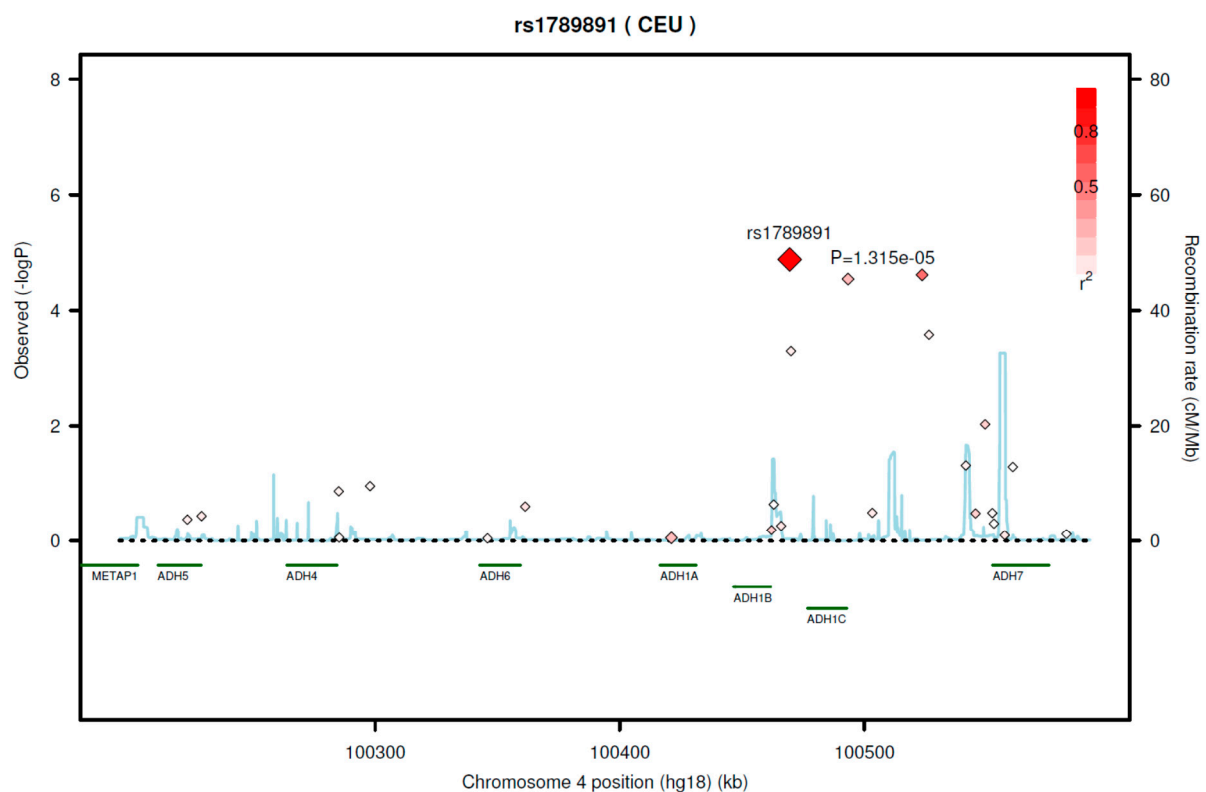

**Figure S2.** Linkage disequilibrium between: (a) rs1789891 and rs1229984 (*ADH1B*\_Arg48His); (b) rs1789891 and rs1693482 (*ADH1C*\_Arg272Gln); and (c) rs1789891 and rs698 (*ADH1C*\_Ile350Val) (<https://analysistools.ncbi.nih.gov/LDlink/?tab=ldpair>; 1000 Genomes Phase 3 data).

- (a) The rs1229984 A-allele containing nucleotide triplet codes for the amino acid histidine (His), resulting in an *ADH1B* enzyme with an increased rate of turnover (opposite strand sequence of the rs1229984 T-allele in the figure below:  $\underline{C}\underline{A}\underline{C}$  coding for His; [https://www.ncbi.nlm.nih.gov/projects/SNP/snp\\_ref.cgi?rs=1229984](https://www.ncbi.nlm.nih.gov/projects/SNP/snp_ref.cgi?rs=1229984)). Linkage disequilibrium between rs1789891 and rs1229984 is low.

rs1789891

rs1229984

CEU ▾

|                             |   | rs1229984<br>chr4:100239319 |         |     |         |
|-----------------------------|---|-----------------------------|---------|-----|---------|
|                             |   | C                           | T       |     |         |
| rs1789891<br>chr4:100250419 | A | 32                          | 1       | 33  | (0.167) |
|                             | C | 163                         | 2       | 165 | (0.833) |
|                             |   | 195                         | 3       | 198 |         |
|                             |   | (0.985)                     | (0.015) |     |         |

| Haplotypes       | Statistics              |
|------------------|-------------------------|
| C_C: 163 (0.823) | D': 0.2                 |
| A_C: 32 (0.162)  | R <sup>2</sup> : 0.0031 |
| C_T: 2 (0.01)    | Chi-sq: 0.6092          |
| A_T: 1 (0.005)   | p-value: 0.4351         |

rs1789891 and rs1229984 are in linkage equilibrium

(b) The rs1693482 C-allele containing nucleotide triplet codes for the amino acid arginine (Arg), which results in an ADH1C enzyme with an increased rate of turnover (opposite strand sequence of the rs1693482 C-allele in the figure below: CGG coding for Arg; [https://www.ncbi.nlm.nih.gov/projects/SNP/snp\\_ref.cgi?rs=1693482](https://www.ncbi.nlm.nih.gov/projects/SNP/snp_ref.cgi?rs=1693482)). The rs1789891 “protective” C-allele is correlated with the rs1693482 “protective” C-allele.

rs1789891      rs1693482      CEU ▾

rs1693482  
chr4:100263965

|                             |   | C       | T       |     |         |
|-----------------------------|---|---------|---------|-----|---------|
| rs1789891<br>chr4:100250419 | A | 0       | 33      | 33  | (0.167) |
|                             | C | 104     | 61      | 165 | (0.833) |
|                             |   | 104     | 94      | 198 |         |
|                             |   | (0.525) | (0.475) |     |         |

| Haplotypes       | Statistics              |
|------------------|-------------------------|
| C_C: 104 (0.525) | D': 1.0                 |
| C_T: 61 (0.308)  | R <sup>2</sup> : 0.2213 |
| A_T: 33 (0.167)  | Chi-sq: 43.8128         |
| A_C: 0 (0.0)     | p-value: <0.0001        |

rs1789891(A) allele is correlated with rs1693482(T) allele  
rs1789891(C) allele is correlated with rs1693482(C) allele

(c) The rs698 A-allele containing nucleotide triplet codes for the amino acid isoleucine (Ile), which results in an ADH1C enzyme with an increased rate of turnover (opposite strand sequence of the rs698 T-allele in the figure below: ATT coding for Ile; [https://www.ncbi.nlm.nih.gov/projects/SNP/snp\\_ref.cgi?rs=698](https://www.ncbi.nlm.nih.gov/projects/SNP/snp_ref.cgi?rs=698)). The rs1789891 “protective” C-allele is correlated with the rs698 “protective” T-allele.

rs1789891      rs698      CEU ▾

rs698  
chr4:100260789

|                             |   | C       | T       |     |         |
|-----------------------------|---|---------|---------|-----|---------|
| rs1789891<br>chr4:100250419 | A | 33      | 0       | 33  | (0.167) |
|                             | C | 61      | 104     | 165 | (0.833) |
|                             |   | 94      | 104     | 198 |         |
|                             |   | (0.475) | (0.525) |     |         |

| Haplotypes       | Statistics              |
|------------------|-------------------------|
| C_T: 104 (0.525) | D': 1.0                 |
| C_C: 61 (0.308)  | R <sup>2</sup> : 0.2213 |
| A_C: 33 (0.167)  | Chi-sq: 43.8128         |
| A_T: 0 (0.0)     | p-value: <0.0001        |

rs1789891(A) allele is correlated with rs698(C) allele  
rs1789891(C) allele is correlated with rs698(T) allele

**Table S1.** Top SNPs from the single marker analysis in the combined sample, and their respective P-values in the subsamples. SNPs with  $P_{\text{uncorrected}} < 1.00e-04$  are shown. SNP: Single Nucleotide Polymorphism; OR: Odds Ratio. MAF: minor allele frequency; AD: alcohol dependence; ACP: chronic alcoholic pancreatitis; ALC: alcohol-related cirrhosis; Chr: chromosome.

| Gene (RefSeq)                                                                                                                           | Chr | SNP       | Position  | Effect allele in the combined sample | Combined sample<br>(2841 cases, 3684 controls); |                                                                            | ACP+ALC subsample<br>(1510 cases, 1750 controls) |                                                                        | AD subsample<br>(1331 cases, 1934 controls) |                                                                         |
|-----------------------------------------------------------------------------------------------------------------------------------------|-----|-----------|-----------|--------------------------------------|-------------------------------------------------|----------------------------------------------------------------------------|--------------------------------------------------|------------------------------------------------------------------------|---------------------------------------------|-------------------------------------------------------------------------|
|                                                                                                                                         |     |           |           |                                      | P-Value [OR]                                    | Genotype counts:<br>All (MAF),<br>Affected (MAF),<br>Unaffected (MAF)      | P-Value [OR]                                     | Genotype counts:<br>All (MAF),<br>Affected (MAF),<br>Unaffected (MAF)  | P-Value [OR]                                | Genotype counts:<br>All (MAF),<br>Affected (MAF),<br>Unaffected (MAF)   |
| Protein phosphatase 1 regulatory subunit 16B ( <i>PPP1R16B</i> )<br>Family With Sequence Similarity 83 Member D ( <i>FAM83D</i> , near) | 20  | rs10392   | 36984349  | A                                    | 8.336e-07 [1.252]                               | 242/2049/4232 (0.1942)<br>140/927/1774 (0.2124)<br>102/1122/2458 (0.1801)  | 0.002328 [1.219]                                 | 132/1031/2095 (0.1987)<br>75/498/937 (0.2146)<br>57/533/1158 (0.1851)  | 0.0002549 [1.268]                           | 110/1018/2137 (0.1896)<br>65/429/837 (0.21)<br>45/589/1300 (0.1755)     |
| Zinc finger protein 697 ( <i>ZNF697</i> , near)                                                                                         | 1   | rs454510  | 119996565 | A                                    | 3.334e-06 [1.206]                               | 512/2699/3309 (0.2855)<br>241/1251/1346 (0.3053)<br>271/1448/1963 (0.2702) | 1.175e-05 [1.294]                                | 245/1358/1653 (0.2838)<br>129/678/701 (0.3103)<br>116/680/952 (0.2609) | 0.05006 [1.117]                             | 267/1341/1656 (0.2872)<br>112/573/645 (0.2996)<br>155/768/1011 (0.2787) |
| Spermatogenesis associated serine rich 2 like ( <i>SPATS2L</i> )                                                                        | 2   | rs2028201 | 201011255 | T                                    | 4.928e-06 [1.183]                               | 1041/3063/2411 (0.3949)<br>508/1363/969 (0.4188)<br>533/1700/1442 (0.3763) | 0.001659 [1.182]                                 | 518/1541/1198 (0.3956)<br>263/740/506 (0.4195)<br>255/801/692 (0.375)  | 0.0008096 [1.189]                           | 523/1522/1213 (0.3941)<br>245/623/463 (0.4181)<br>278/899/750 (0.3775)  |
| Intergenic                                                                                                                              | 22  | rs926544  | 37901380  | T                                    | 1.133e-05 [0.8113]                              | 221/1865/4431 (0.177)<br>87/742/2010 (0.1613)<br>134/1123/2421 (0.1891)    | 0.04158 [0.8704]                                 | 112/906/2237 (0.1736)<br>46/403/1060 (0.164)<br>66/503/1177 (0.1818)   | 4.003e-05 [0.7576]                          | 109/959/2194 (0.1804)<br>41/339/950 (0.1583)<br>68/620/1244 (0.1957)    |
| Alcohol Dehydrogenase 1B ( <i>ADH1B</i> , near), Alcohol Dehydrogenase 1C ( <i>ADH1C</i> , near)                                        | 4   | rs1789891 | 100469442 | A                                    | 1.315e-05 [1.232]                               | 200/1782/4507 (0.1681)<br>102/850/1879 (0.1862)<br>98/932/2628 (0.1542)    | 0.6392 [1.033]                                   | 106/910/2209 (0.174)<br>49/440/1011 (0.1793)<br>57/470/1198 (0.1693)   | 1.642e-08 [1.469]                           | 94/872/2298 (0.1624)<br>53/410/868 (0.1938)<br>41/462/1430 (0.1407)     |
| Long non-coding RNA STX18 antisense RNA 1 ( <i>STX18-AS1</i> , near)                                                                    | 4   | rs1000579 | 4770395   | G                                    | 1.471e-05 [1.172]                               | 1176/3195/2151 (0.4253)<br>569/1414/858 (0.4491)<br>607/1781/1293 (0.4068) | 0.4327 [1.042]                                   | 600/1567/1090 (0.4248)<br>285/742/483 (0.4344)<br>315/825/607 (0.4164) | 1.638e-07 [1.315]                           | 576/1628/1061 (0.4257)<br>284/672/375 (0.4658)<br>292/956/686 (0.3981)  |
| CD5 molecule like ( <i>CD5L</i> )                                                                                                       | 1   | rs2765501 | 156071272 | A                                    | 1.539e-05 [0.8522]                              | 1244/3284/1996 (0.4424)<br>494/1419/927 (0.4238)<br>750/1865/1069 (0.4567) | 0.01413 [0.8782]                                 | 648/1646/965 (0.4514)<br>277/770/462 (0.4387)<br>371/876/503 (0.4623)  | 0.0003157 [0.828]                           | 596/1638/1031 (0.4334)<br>217/649/465 (0.4068)<br>379/989/566 (0.4517)  |
| Intergenic                                                                                                                              | 12  | rs1846035 | 82545653  | G                                    | 1.542e-05 [0.8499]                              | 885/2957/2663 (0.3633)<br>357/1243/1225 (0.3464)<br>528/1714/1438 (0.3764) | 0.0011 [0.8389]                                  | 466/1508/1278 (0.3752)<br>204/678/622 (0.361)<br>262/830/656 (0.3873)  | 0.001861 [0.8472]                           | 419/1449/1385 (0.3515)<br>153/565/603 (0.3297)<br>266/884/782 (0.3665)  |

|                                                                                                              |    |            |           |   |                       |                                                                            |                       |                                                                        |                       |                                                                        |
|--------------------------------------------------------------------------------------------------------------|----|------------|-----------|---|-----------------------|----------------------------------------------------------------------------|-----------------------|------------------------------------------------------------------------|-----------------------|------------------------------------------------------------------------|
| SATB homeobox 2 ( <i>SATB2</i> )                                                                             | 2  | rs3828186  | 199922518 | C | 1.581e-05<br>[0.7736] | 73/1304/5147 (0.1111)<br>27/483/2330 (0.09454)<br>46/821/2817 (0.1239)     | 0.0001147<br>[0.7135] | 33/636/2590 (0.1077)<br>12/236/1261 (0.08615)<br>21/400/1329 (0.1263)  | 0.03371<br>[0.8408]   | 40/668/2557 (0.1145)<br>15/247/1069 (0.1041)<br>25/421/1488 (0.1218)   |
| STIP1 homology and U-box containing protein 1 ( <i>STUB1</i> ); Jumonji domain containing 8 ( <i>JMJD8</i> ) | 16 | rs6597     | 671726    | G | 1.741e-05<br>[1.247]  | 143/1543/4828 (0.1404)<br>69/738/2030 (0.1544)<br>74/805/2798 (0.1296)     | 0.06735<br>[1.143]    | 73/814/2363 (0.1477)<br>36/396/1075 (0.1553)<br>37/418/1288 (0.1411)   | 4.605e-05<br>[1.347]  | 70/729/2465 (0.1331)<br>33/342/955 (0.1534)<br>37/387/1510 (0.1192)    |
| Cdk5 and Abl enzyme substrate 1 ( <i>CABLES1</i> , near)                                                     | 18 | rs11874608 | 18954411  | T | 2.132e-05<br>[0.8563] | 1484/3280/1756 (0.4791)<br>593/1431/815 (0.4609)<br>891/1849/941 (0.4932)  | 0.0005777<br>[0.8355] | 742/1613/901 (0.4756)<br>310/751/448 (0.4543)<br>432/862/453 (0.494)   | 0.01871<br>[0.8855]   | 742/1667/855 (0.4827)<br>283/680/367 (0.4684)<br>459/987/488 (0.4925)  |
| Unc-51 like kinase 4 ( <i>ULK4</i> )                                                                         | 3  | rs6809441  | 41469609  | C | 2.42e-05<br>[0.8471]  | 641/2865/3019 (0.3178)<br>237/1222/1382 (0.2985)<br>404/1643/1637 (0.3327) | 0.1328<br>[0.919]     | 324/1440/1496 (0.3202)<br>134/674/702 (0.3119)<br>190/766/794 (0.3274) | 5.745e-06<br>[0.7757] | 317/1425/1523 (0.3153)<br>103/548/680 (0.2832)<br>214/877/843 (0.3374) |
| Intergenic                                                                                                   | 4  | rs1372680  | 100523568 | A | 2.425e-05<br>[1.284]  | 72/1191/5261 (0.1023)<br>33/589/2219 (0.1153)<br>39/602/3042 (0.09232)     | 0.2557<br>[1.101]     | 36/613/2610 (0.1051)<br>12/313/1185 (0.1116)<br>24/300/1425 (0.09949)  | 2.627e-06<br>[1.482]  | 36/578/2651 (0.09954)<br>21/276/1034 (0.1195)<br>15/302/1617 (0.08583) |
| Alcohol Dehydrogenase 1C ( <i>ADH1C</i> , near)                                                              | 4  | rs1789924  | 100493309 | T | 2.869e-05<br>[1.166]  | 1127/3166/2231 (0.4154)<br>525/1427/888 (0.4361)<br>602/1739/1343 (0.3994) | 0.5368<br>[1.033]     | 562/1600/1097 (0.4179)<br>266/746/497 (0.4235)<br>296/854/600 (0.4131) | 1.274e-07<br>[1.314]  | 565/1566/1134 (0.4129)<br>259/681/391 (0.4504)<br>306/885/743 (0.387)  |
| Long intergenic non-protein coding RNA 598 transcript variant TTL-B1 ( <i>LINC00598</i> , near)              | 13 | rs9549180  | 39811462  | T | 2.945e-05<br>[0.8277] | 270/2195/4056 (0.2097)<br>83/921/1835 (0.1914)<br>187/1274/2221 (0.2238)   | 0.0001005<br>[0.7757] | 134/1094/2028 (0.2092)<br>40/486/982 (0.1877)<br>94/608/1046 (0.2277)  | 0.04086<br>[0.878]    | 136/1101/2028 (0.2103)<br>43/435/853 (0.1957)<br>93/666/1175 (0.2203)  |
| Ceramide synthase 5 ( <i>CERS5</i> )                                                                         | 12 | rs2242507  | 48813081  | A | 3.41e-05<br>[0.8408]  | 427/2502/3586 (0.2576)<br>150/1066/1620 (0.2408)<br>277/1436/1966 (0.2705) | 0.001482<br>[0.8271]  | 222/1258/1779 (0.2611)<br>81/581/848 (0.246)<br>141/677/931 (0.2742)   | 0.004353<br>[0.844]   | 205/1244/1807 (0.254)<br>69/485/772 (0.2349)<br>136/759/1035 (0.2671)  |
| X-ray repair cross complementing 5 ( <i>XRCC5</i> )                                                          | 2  | rs828704   | 216701856 | C | 3.44e-05<br>[1.202]   | 277/2192/4049 (0.2106)<br>140/1020/1681 (0.2288)<br>137/1172/2368 (0.1966) | 0.02829<br>[1.153]    | 129/1099/2032 (0.20819)<br>77/514/919 (0.2212)<br>52/585/1113 (0.1969) | 0.0001554<br>[1.263]  | 148/1093/2017 (0.2132)<br>63/506/762 (0.2374)<br>85/587/1255 (0.1964)  |
| Zinc finger protein 697 ( <i>ZNF697</i> )                                                                    | 1  | rs838989   | 119984429 | G | 4.062e-05<br>[1.17]   | 752/2892/2871 (0.3374)<br>351/1313/1177 (0.3546)<br>401/1579/1694 (0.324)  | 0.0001748<br>[1.23]   | 369/1426/1465 (0.3319)<br>189/692/629 (0.3543)<br>180/734/836 (0.3126) | 0.05974<br>[1.106]    | 383/1466/1406 (0.3429)<br>162/621/548 (0.355)<br>221/845/858 (0.3345)  |
| Calpain 9 ( <i>CAPN9</i> )                                                                                   | 1  | rs6677009  | 228973577 | C | 4.091e-05<br>[0.8456] | 493/2697/3335 (0.2822)<br>194/1122/1525 (0.2658)<br>299/1575/1810 (0.2949) | 0.004703<br>[0.8456]  | 228/1332/1700 (0.2742)<br>97/587/826 (0.2586)<br>131/745/874 (0.2877)  | 0.003944<br>[0.8483]  | 265/1365/1635 (0.2902)<br>97/535/699 (0.2739)<br>168/830/936 (0.3014)  |
| Tumor necrosis factor superfamily member 18 ( <i>TNFSF18</i> )                                               | 1  | rs1883478  | 171251854 | G | 4.205e-05<br>[0.8591] | 1011/3085/2427 (0.3915)<br>400/1317/1124 (0.3726)<br>611/1768/1303 (0.406) | 0.001255<br>[0.8416]  | 495/1535/1230 (0.3873)<br>207/702/601 (0.3695)<br>288/833/629 (0.4026) | 0.01027<br>[0.8748]   | 516/1550/1197 (0.3956)<br>193/615/523 (0.376)<br>323/935/674 (0.4092)  |

|                                                                                                                                |    |            |           |   |                       |                                                                             |                      |                                                                        |                       |                                                                        |
|--------------------------------------------------------------------------------------------------------------------------------|----|------------|-----------|---|-----------------------|-----------------------------------------------------------------------------|----------------------|------------------------------------------------------------------------|-----------------------|------------------------------------------------------------------------|
| Fatty acid amide hydrolase<br>( <i>FAAH</i> , near);<br>Fatty acid amide hydrolase<br>pseudogene 1 ( <i>FAAHPI</i> , near)     | 1  | rs4660928  | 46658527  | A | 5.841e-05<br>[0.8494] | 510/2664/3351 (0.2823)<br>195/1109/1537 (0.2638)<br>315/1555/1814 (0.2966)  | 0.000651<br>[0.82]   | 262/1356/1642 (0.2883)<br>102/606/802 (0.2682)<br>160/750/840 (0.3057) | 0.01678<br>[0.8716]   | 248/1308/1709 (0.2763)<br>93/503/735 (0.2588)<br>155/805/974 (0.2883)  |
| Neuroblastoma breakpoint<br>family member 10 ( <i>NBPF10</i> )                                                                 | 1  | rs999095   | 145676851 | G | 6.194e-05<br>[1.229]  | 141/1539/4844 (0.1396)<br>68/745/2028 (0.1551)<br>73/794/2816 (0.1276)      | 0.000343<br>[1.316]  | 53/778/2428 (0.1356)<br>29/408/1073 (0.1543)<br>24/370/1355 (0.1195)   | 0.03316<br>[1.161]    | 88/761/2416 (0.1435)<br>39/337/955 (0.1559)<br>49/424/1461 (0.135)     |
| Guanine deaminase ( <i>GDA</i> )                                                                                               | 9  | rs17494172 | 74008904  | G | 6.956e-05<br>[0.7768] | 58/1081/5385 (0.09174)<br>22/422/2397 (0.08201)<br>36/659/2988 (0.09924)    | 0.01125<br>[0.7906]  | 27/513/2720 (0.08696)<br>11/219/1280 (0.0798)<br>16/294/1440 (0.09314) | 0.003083<br>[0.7703]  | 31/568/2665 (0.09651)<br>11/203/1117 (0.08452)<br>20/365/1548 (0.1048) |
| SATB homeobox 2 ( <i>SATB2</i> )                                                                                               | 2  | rs6752494  | 200021568 | C | 7.122e-05<br>[0.8077] | 131/1490/4880 (0.1347)<br>51/565/2215 (0.1178)<br>80/925/2665 (0.1478)      | 0.001301<br>[0.7777] | 66/717/2453 (0.1312)<br>27/276/1197 (0.11)<br>39/441/1256 (0.1495)     | 0.02233<br>[0.8431]   | 65/773/2427 (0.1383)<br>24/289/1018 (0.1266)<br>41/484/1409 (0.1463)   |
| Collagen type XXII alpha 1<br>chain ( <i>COL22A1</i> )                                                                         | 8  | rs11166844 | 139848062 | C | 7.172e-05<br>[0.8635] | 1070/3139/2303 (0.4053)<br>428/1327/1078 (0.3853)<br>642/1812/1225 (0.4208) | 0.002661<br>[0.8516] | 520/1578/1152 (0.4028)<br>221/712/572 (0.3834)<br>299/866/580 (0.4195) | 0.008264<br>[0.8721]  | 550/1561/1151 (0.4079)<br>207/615/506 (0.3874)<br>343/946/645 (0.4219) |
| Membrane spanning 4-<br>domains A4A ( <i>MS4A4A</i> ,<br>near);<br>Membrane spanning 4-<br>domains A6E ( <i>MS4A6E</i> , near) | 11 | rs10897029 | 59840645  | T | 7.317e-05<br>[1.207]  | 202/1850/4448 (0.1734)<br>103/870/1859 (0.19)<br>99/980/2589 (0.1606)       | 0.001994<br>[1.237]  | 97/949/2207 (0.1757)<br>56/470/978 (0.1935)<br>41/479/1229 (0.1604)    | 0.01262<br>[1.181]    | 105/901/2241 (0.1711)<br>47/400/881 (0.186)<br>58/501/1360 (0.1608)    |
| Myosin light chain kinase<br>( <i>MYLK</i> )                                                                                   | 3  | rs7641248  | 124909674 | C | 7.411e-05<br>[0.7978] | 90/1347/5088 (0.117)<br>37/524/2280 (0.1052)<br>53/823/2808 (0.1261)        | 0.02176<br>[0.8309]  | 47/669/2544 (0.117)<br>27/275/1208 (0.1089)<br>20/394/1336 (0.124)     | 0.0007182<br>[0.7583] | 43/678/2544 (0.117)<br>10/249/1072 (0.1011)<br>33/429/1472 (0.128)     |
| Transcription factor B1,<br>mitochondrial ( <i>TFB1M</i> )                                                                     | 6  | rs324356   | 155648017 | T | 7.435e-05<br>[0.8664] | 1555/3236/1728 (0.4867)<br>632/1405/803 (0.4699)<br>923/1831/925 (0.4997)   | 0.00223<br>[0.8525]  | 781/1620/855 (0.4886)<br>336/757/417 (0.4732)<br>445/863/438 (0.498)   | 0.00969<br>[0.8767]   | 774/1616/873 (0.4848)<br>296/648/386 (0.4662)<br>478/968/487 (0.4977)  |
| Kalirin, RhoGEF kinase<br>( <i>KALRN</i> )                                                                                     | 3  | rs4678095  | 125439286 | T | 8.172e-05<br>[0.8676] | 1546/3219/1758 (0.4837)<br>605/1429/806 (0.4646)<br>941/1790/952 (0.4985)   | 0.006406<br>[0.8695] | 771/1568/919 (0.4773)<br>317/749/443 (0.4583)<br>454/819/476 (0.4937)  | 0.00872<br>[0.874]    | 775/1651/839 (0.4902)<br>288/680/363 (0.4718)<br>487/971/476 (0.4972)  |
| SEL1L family member 3<br>( <i>SEL1L3</i> )                                                                                     | 4  | rs6842695  | 25470457  | C | 9.417e-05<br>[0.8053] | 107/1399/5019 (0.1236)<br>42/545/2254 (0.1107)<br>65/854/2765 (0.1336)      | 0.02503<br>[0.8359]  | 54/669/2537 (0.1192)<br>20/283/1207 (0.107)<br>34/386/1330 (0.1297)    | 0.003529<br>[0.7969]  | 53/730/2482 (0.128)<br>22/262/1047 (0.115)<br>31/468/1435 (0.137)      |

rs7946005 and rs12166576 were excluded due to poor resolution cluster plots.
